# Supplementary material for: Obesity and its associated risk factors among school-aged children in Sharjah, UAE
Source: PubMed Central journal article supplement (PMC7274381; doi:10.1371/journal.pone.0234244), 2020-06-05
Supplement: pone.0234244.s004.pdf [file pone.0234244.s004.pdf]

College of Pharmacy

Department of Pharmacy Practice & Pharmacotherapeutics

Title: Obesity and its associated risk factors among school-aged children in Sharjah, UAE

Dear respected parents:

This project aims at investigation the prevalence of overweight and obesity among school children. Your voluntary participation in filling the questionnaire will help us in studying the problem of obesity and pinpointing the risk factors contributing to the problem. Our trained researchers with your permission will non-invasively measure some parameters of the children in school under the supervision of school teachers. Your identity is not revealed at any stage of the study and you are free to withdraw at any stage of the study. Your help and cooperation by willingly participating would be greatly appreciated.

**SECTION 1: SOCIO-DEMOGRAPHIC AND CLINICAL CHARACTERISTICS**

1. Gender:             Male             Female

2. Age: \_\_\_\_\_

3. Nationality:       Arab             Non-Arab

4. Weight: \_\_\_\_\_

5. Height: \_\_\_\_\_

6. BMI-P: \_\_\_\_\_

Underweight  Normal  Overweight  Obese

7. Family history of obesity:  Yes     No



10. How much time do you leave between your last meal (dinner) and bedtime?

0-30 minutes

30 minutes – 1 hour

1 hour to 2 hours

More than 2 hours

11. How often do you eat fast-food?

Always (Everyday or almost everyday)

Often (A few times a week)

Sometimes (About once a week)

Rare

12. How often do you eat candy?

Always (Everyday or almost everyday)

Often (A few times a week)

Sometimes (About once a week)

Rare

13. How many of your meals include healthy food (Fruits/Vegetables/etc.)?

0

1

2

3

4 or more

14. How much time do you spend watching TV?

- 30 minutes
- 30 minutes to 1 hour
- 1 hour to 2 hours
- More than 2 hours

15. How much time you spend on your (phone, tablet, computer):

- 30 minutes
- 30 minutes to 1 hour
- 1 hour to 2 hours
- More than 2 hours

16. Do you suffer from any disease?

- No
- Yes, mention please \_\_\_\_\_

17. Are you on any medication or supplements?

- No
- Yes, mention please \_\_\_\_\_

18. How often do you workout or go on for outside activity?

- Always (everyday or almost everyday)
- Often (once a week)
- Sometimes (once a month)
- Rare
